# Supplementary material
Source: PubMed Central journal article supplement (PMC3703442)
Supplement: NIHMS452549-supplement-Table_S1.pdf [file NIHMS452549-supplement-Table_S1.pdf]

Figure 1

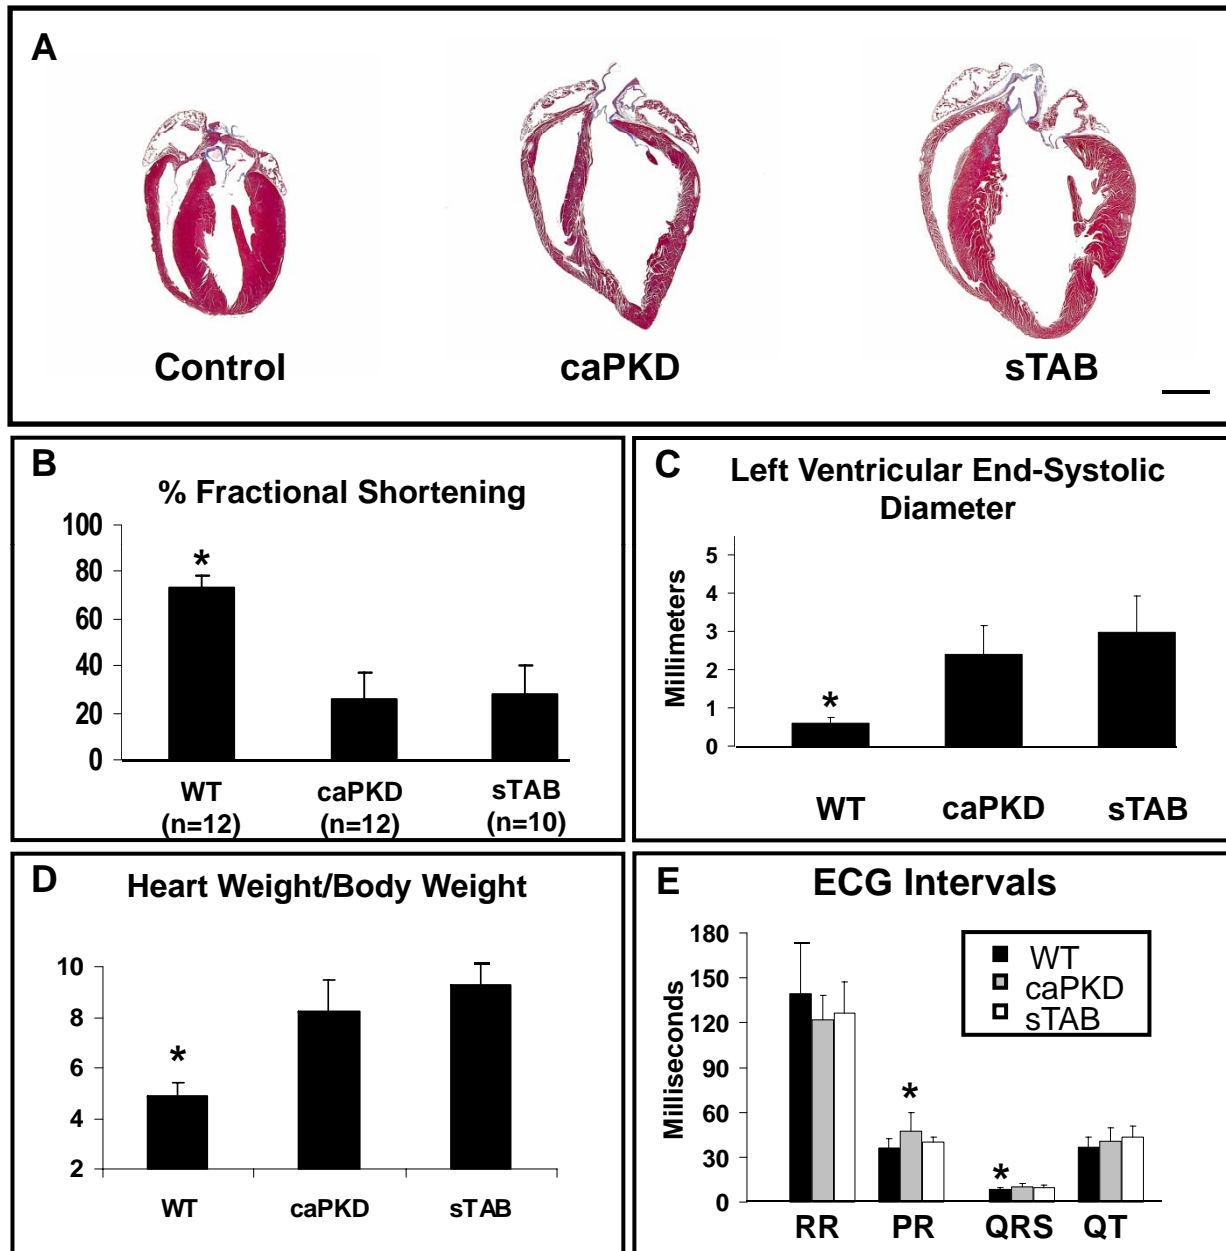

Figure 2

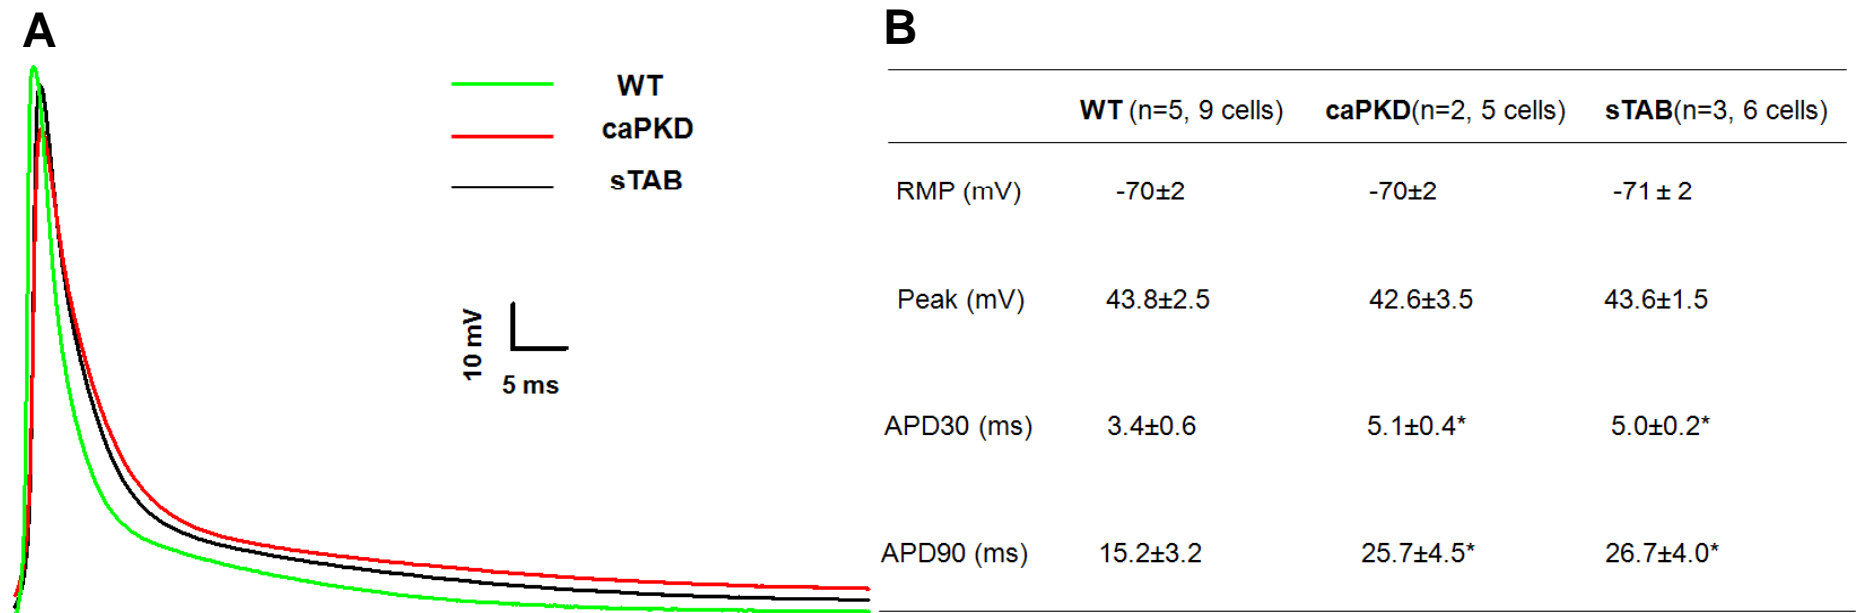

Figure 3

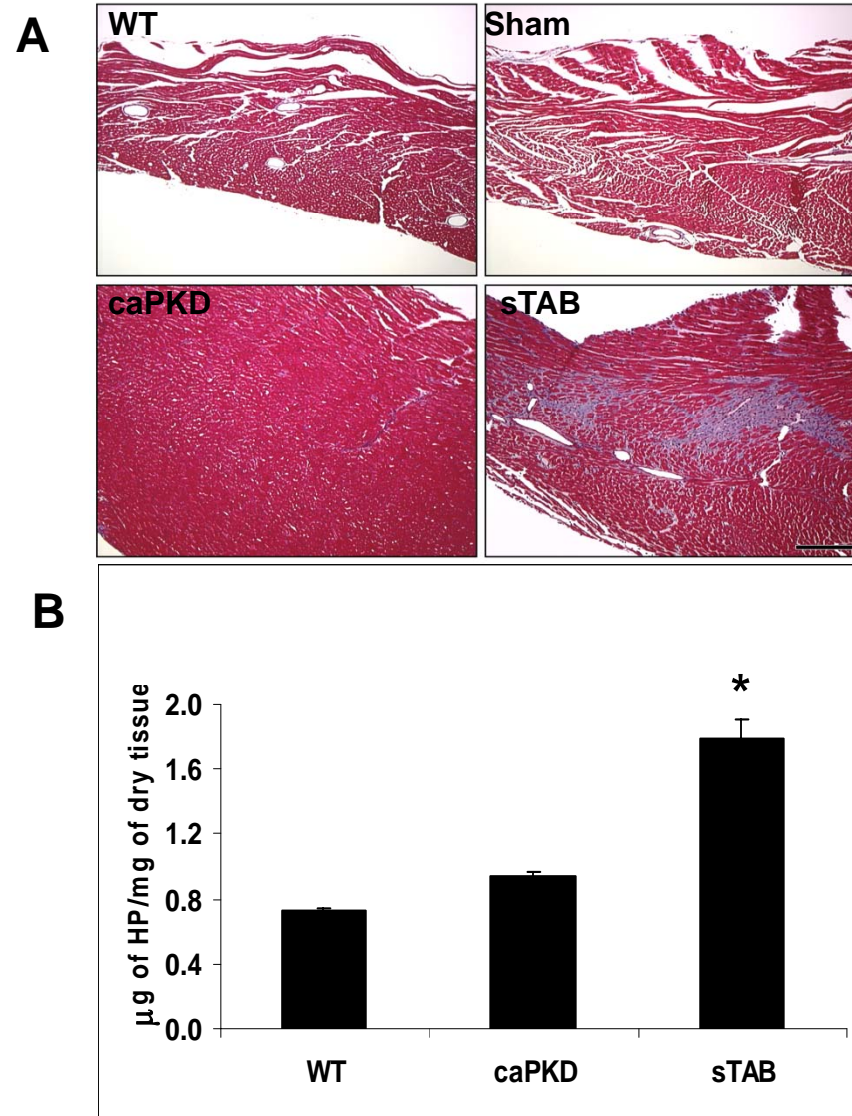

Figure 4

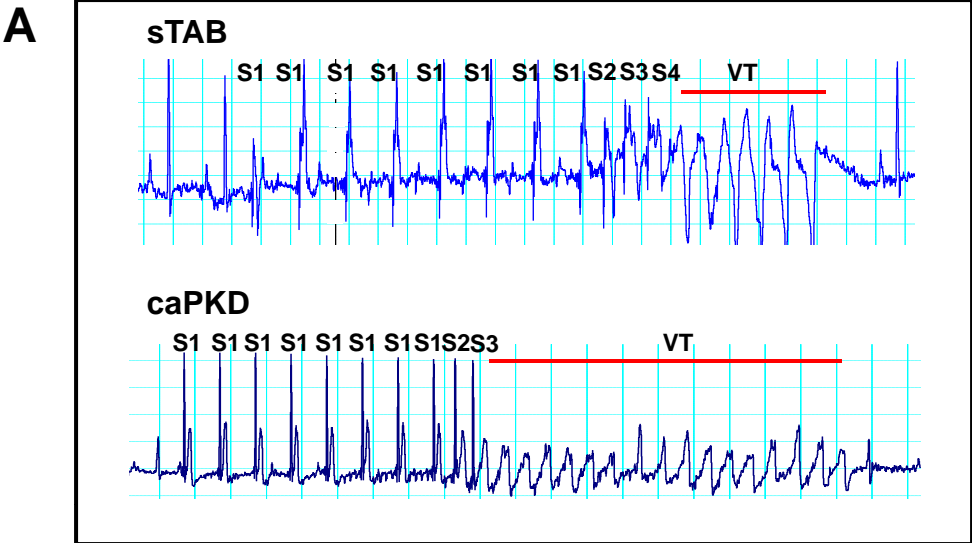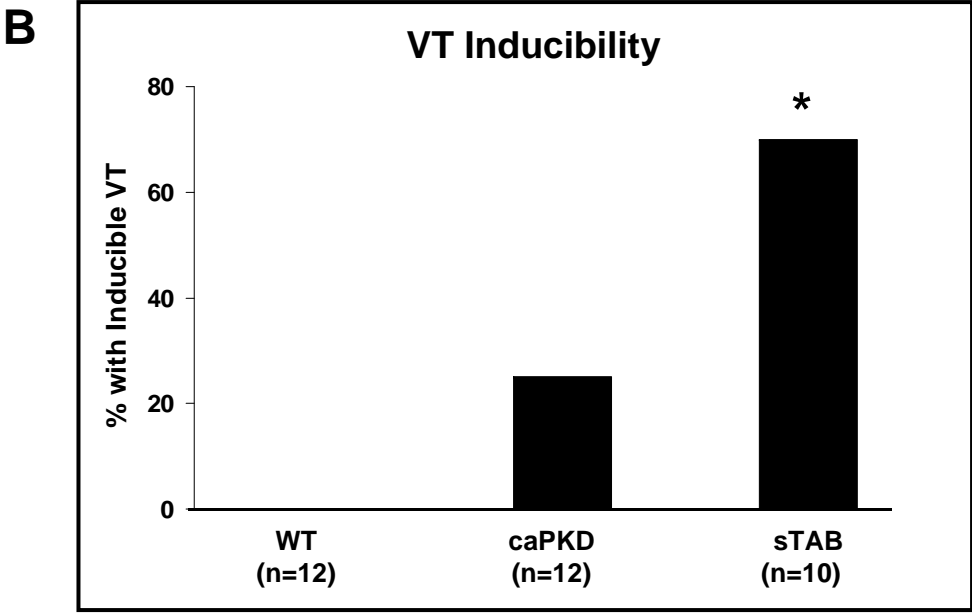

Figure 5

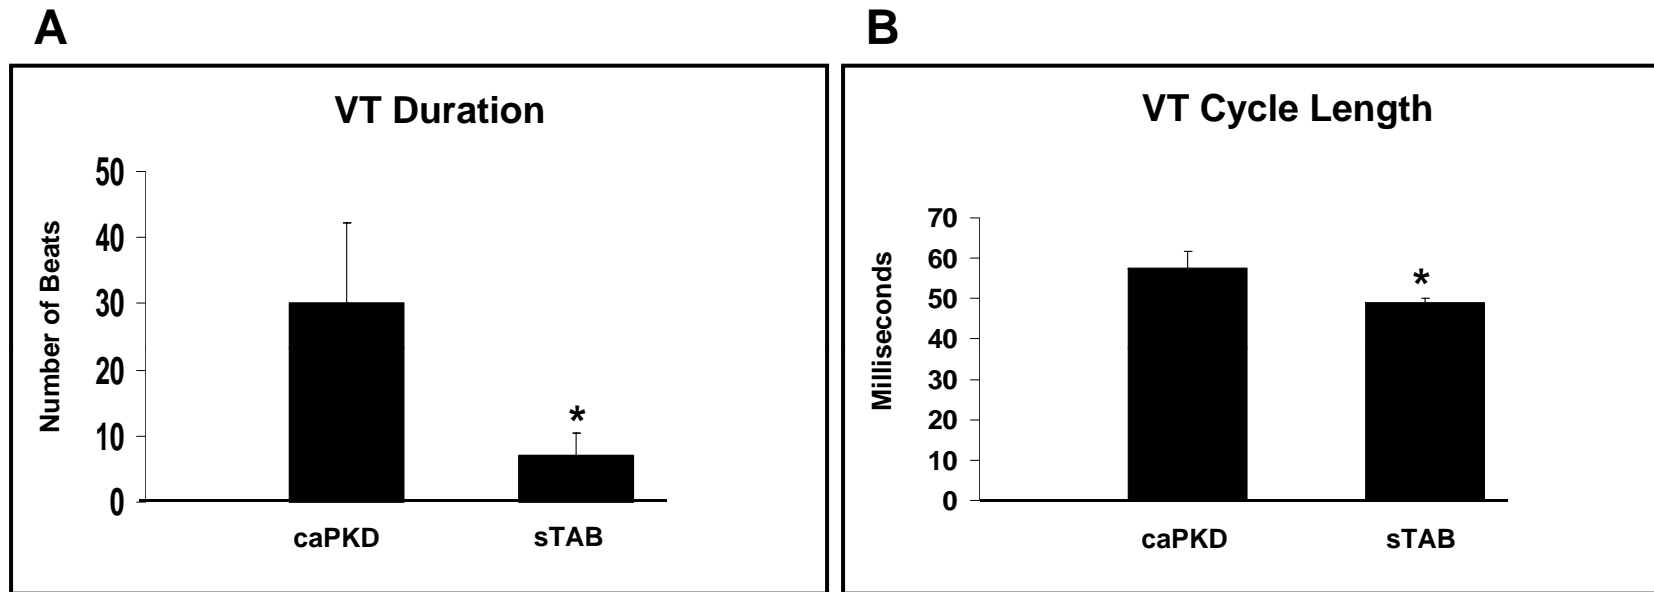

## SupplementalTable 1

### Electrophysiological parameters in WT, sTAB and caPKD mice

|                               | WT (n=12)  | sTAB (n=10) | caPKD (n=12) |
|-------------------------------|------------|-------------|--------------|
| Heart rate (bpm)              | 451.8±91.5 | 447.6±82.5  | 492.1±72.3   |
| PR Interval (msec)            | 35.9±6.7   | 40.±3.41    | 47.5±12.5*   |
| QRS duration (msec)           | 8.4±1      | 9.75±1.44   | 10.4±2.2     |
| QT Interval (msec)            | 36.8±6.9   | 43.17±7.39  | 40.67±9.15   |
| V capture threshold (mA)      | 23.8±7.4   | 25±13.2     | 31.67±18.4   |
| VERP (msec)                   | 39.6±7.8   | 35.83±7.36  | 47.92±11.4#  |
| VT duration (number of beats) | n/a        | 7±3.46      | 30±12.2#     |
| VT duration (msec)            | n/a        | 373.33±200  | 1833±723#    |
| VT cycle length (msec)        | n/a        | 49±1        | 57.67±4.04#  |

VERP=Ventricular effective refractory period, VT=Ventricular tachycardia

\* p<0.05 compared with WT

# p<0.05 compared with sTAB
